# Supplementary material
Source: PubMed Central journal article supplement (PMC7337669)
Supplement: jjaa126_suppl_supplementary_material_1.pdf [file jjaa126_suppl_supplementary_material_1.pdf]

**IBD – Coronavirus -Survey**

Age: \_\_\_\_\_. I live in the state of: \_\_\_\_\_

Sex:  female  male          today's date: \_\_\_\_\_

Higheste educational degree:  Hauptschule  Realschule  High school  College degree

Profession: \_\_\_\_\_

**Bowel disease:**  Crohn's disease  Ulcerative colitis  other: \_\_\_\_\_

**Medical conditions:**

Lung disease:  Asthma  COPD  other: \_\_\_\_\_

Heart disease:  Coronary heart disease  Arterial hypertension  other \_\_\_\_\_

Liver disease:  Primary sclerosing cholangitis (PSC)  Liver cirrhosis  Fatty liver disease

Diabetes mellitus

other \_\_\_\_\_

**Current therapy:**

Cortisole

Mesalazine (Salofalk, Pentasa etc.)

Adalimumab (Humira, Imraldi, Amgevita, Hyrimoz etc.)

Vedolizumab (Entyvio)

Infliximab (Remicade, Remsima, Flixabi etc.)

Ustekinumab (Stelara)

Tofacitinib (Xeljanz)

Methotrexat

Azathioprin / 6-Mercaptopurin (Puri Nethol)

Other: \_\_\_\_\_

**I have been vaccinated against the flu in the last 12 months**       yes       no

I smoke a cigarette at least one day a week       yes       no

**My inflammatory bowel disease is momentarily:**

quiet       mildly active       chronically active       in a flare

**I get guidance for my behaviour concerning the Coronavirus from (Please name the two most important sources):**

DCCV

Robert-Koch-Institut

IBD forums

Television

News sites (Internet)

Friends/Family

regional newspaper       nationwide newspaper

Physician

Please rate the following statements as follows:

| Strongly Disagree          | Disagree                   | Neutral                    | Agree                      | Strongly agree             |
|----------------------------|----------------------------|----------------------------|----------------------------|----------------------------|
| <input type="checkbox"/> 1 | <input type="checkbox"/> 2 | <input type="checkbox"/> 3 | <input type="checkbox"/> 4 | <input type="checkbox"/> 5 |

**I am scared to get infected with the Coronavirus**

1       2       3       4       5

**I am afraid that my medication could worsen a Coronavirus infection**

1       2       3       4       5

**I am afraid to get infected in the hospital**

1       2       3       4       5

**I am afraid to get infected in the private practice**

1       2       3       4       5

**I am afraid to get infected in the supermarket**

1       2       3       4       5

**I would prefer a video consultation over a consultation in person**

1       2       3       4       5

**I leave the house less frequently than before the Coronavirus pandemic**

1       2       3       4       5

**I leave the house less frequently than my partner/flatmate**

1       2       3       4       5

Please answer the following questions with yes or no

**I was infected with the Coronavirus**

yes       no

**I had exposure to a Coronavirus infected person**

yes       no

**I reduced my medication on my own account**

yes       no - if yes, which one? \_\_\_\_\_

**I wear personal protective gear when leaving the house**

yes       no

**If yes, did you handcraft your facemask?**

yes       no

**I wash my hands more frequently than before**

yes       no

**I tried to contact my physician to talk about the Coronavirus**

yes       no

If yes, which physician:       Family physician       Gastroenterologist

Where you successful?:       yes       no

If no, why weren't you successful?: \_\_\_\_\_
